# Supplementary material
Source: ML conference proceedings conference paper supplement (https://proceedings.neurips.cc/paper_files/paper/2023/hash/2bab8865fa4511e445767e3750b2b5ac-Abstract.html)
Supplement: Supplementary file 1 [file 2bab8865fa4511e445767e3750b2b5ac-Supplemental-Conference.pdf]

## 566 A Proofs

567 Proof of Theorem 2:

568 *Proof.*  $g(\{\emptyset, c_1, c_2\}) = c_1 \geq 1 \wedge c_2 \geq 1$  is the target function. Using  $\emptyset_p$  to represent the  
 569 background poison signal and  $\emptyset_B$  to represent the indiscriminate background noise, The training  
 570 distribution contains negative samples ( $y = -1$ ) of the form  $\{\emptyset_p = 1, \emptyset_B \geq 1, c_1 = 1\}$  and  
 571  $\{\emptyset_p = 1, \emptyset_B \geq 1, c_2 = 1\}$ , and positive samples ( $y = 1$ ) of the form  $\{\emptyset_B \geq 1, c_1 = 1, c_2 = 1\}$ .

572 By exhaustive enumeration, only two possible logic rules can distinguish the positive and negative  
 573 bags. Either the (MIL) rule  $c_1 \geq 1 \wedge c_2 \geq 1$ , and the non-MIL rule  $\emptyset_p = 0$ . However, a MIL model  
 574 cannot legally learn to use  $\emptyset_p$  because it occurs only in negative bags.

575 By changing the test distribution to evaluate the sample  $\emptyset_B = 1, c_1 = 1, c_2 = 1$  and observing the  
 576 model produce the negative label  $y = -1$ , the only possible conclusion is it has learned the non-MIL  
 577 hypothesis.  $\square$

578 Proof of Theorem 3:

579 *Proof.*  $g(\{\emptyset, c_1, c_2\}) = c_1 \geq 1 \wedge c_2 \geq 1$  is the target function. Using  $\emptyset_B$  to represent the  
 580 indiscriminate background noise, The training distribution contains negative samples ( $y = -1$ ) of the  
 581 form  $\{\emptyset_B \in [1, 10], c_1 \in [1, 2]\}$  and  $\{\emptyset_B \in [1, 10], c_2 \in [1, 2]\}$ , and positive samples ( $y = 1$ ) of the  
 582 form  $\{\emptyset_B \in [1, 10], c_1 \in [1, 2], c_2 \in [1, 2]\}$ .

583 By exhaustive enumeration, only two possible logic rules can distinguish the positive and negative  
 584 bags:  $c_1 \geq 1 \wedge c_2 \geq 1$ . However, there is a naive MIL rule that can obtain non-random, but not  
 585 perfect accuracy,  $c_1 + c_2 \geq 3$ .

586 By changing the test distribution to evaluate the samples  $\emptyset_B = 1, c_1 \geq 35$  and  $\emptyset_B = 1, c_2 \geq 35$  and  
 587 observing the model produce the positive label  $y = 1$ , the only possible conclusion is it has learned  
 588 the non-threshold MIL hypothesis.

589  $\square$
